## 1 Astrocytes close a critical period of motor circuit plasticity

2  
3  
4 Sarah D. Ackerman<sup>1\*</sup>, Nelson A. Perez-Catalan<sup>1</sup>, Marc R. Freeman<sup>2</sup>, and Chris Q. Doe<sup>1\*</sup>

5  
6  
7 <sup>1</sup>Institute of Neuroscience, Howard Hughes Medical Institute, University of Oregon, Eugene,  
8 OR 97403

9 <sup>2</sup>Vollum Institute, Oregon Health and Sciences University, Portland, OR 97239

10  
11  
12 \* Authors for correspondence at [sarah.d.ackerman@gmail.com](mailto:sarah.d.ackerman@gmail.com) (SDA) and  
13 [cdoe@uoregon.edu](mailto:cdoe@uoregon.edu) (CQD)

14  
15 Orcid IDs: 0000-0001-8752-8972 (SDA), 0000-0001-5980-8029 (CQD), 0000-0003-3481-  
16 3715 (MRF)

17  
18  
19 Running Title: Astrocytes close a critical period of motor circuit plasticity

### 20 21 22 **Abstract**

23 Critical periods – brief intervals where neural circuits can be modified by sensory input – are  
24 necessary for proper neural circuit assembly. Extended critical periods are associated with  
25 neurodevelopmental disorders, including schizophrenia and autism; however, the mechanisms  
26 that ensure timely critical period closure remain unknown. Here, we define the extent of a  
27 critical period in the developing *Drosophila* motor circuit, and identify astrocytes as essential  
28 for proper critical period termination. During the critical period, decreased activity produces  
29 larger motor dendrites with fewer inhibitory inputs; conversely, increased motor neuron  
30 activity produces smaller motor dendrites with fewer excitatory inputs. Importantly, activity  
31 has little effect on dendrite morphology after critical period closure. Astrocytes invade the  
32 neuropil just prior to critical period closure, and astrocyte ablation prolongs the critical period.  
33 Finally, we use a genetic screen to identify astrocyte-motor neuron signaling pathways that  
34 close the critical period, including Neuroligin-Neurexin signaling. Reduced signaling  
35 destabilizes dendritic microtubules, increases dendrite dynamicity, and impairs locomotor  
36 behavior, underscoring the importance of critical period closure. Previous work defines  
37 astroglia as regulators of plasticity at individual synapses; here, we show that astrocytes also  
38 regulate large-scale structural plasticity to motor dendrite, and thus, circuit architecture to  
39 ensure proper locomotor behavior.

## 42 Main

43  
44 Critical periods are brief windows where neural circuit activity can modify the morphological  
45 properties of neurons<sup>1,2</sup>. Critical periods integrate two opposing forces of plasticity to modify  
46 neural circuits. Hebbian plasticity alters the function of individual synapses<sup>3</sup>, whereas  
47 homeostatic plasticity encompasses changes to synaptic number, structure (*homeostatic*  
48 *structural plasticity*), and function (*homeostatic synaptic plasticity*) across an entire neuron, as  
49 well changes to local and long-range connectivity<sup>1</sup>. While homeostatic plasticity can occur in  
50 some areas of the adult brain, dramatic activity-dependent remodeling is largely restricted to  
51 early development<sup>3-6</sup>. Indeed, failure to terminate critical period plasticity is linked to a  
52 number of neurodevelopmental and neuropsychiatric disorders, such as autism and  
53 schizophrenia<sup>2,7-10</sup>. Although critical period closure must be tightly regulated, the molecular  
54 mechanisms involved are poorly understood.

### 55 56 A critical period of motor circuit plasticity

57  
58 To investigate critical period closure, we focused on two well-characterized *Drosophila* motor  
59 neurons (MNs), aCC and RP2<sup>11,12</sup>. These MNs are segmentally repeated in the embryonic and  
60 larval CNS (Fig. 1a), and are susceptible to activity-induced remodeling, but these pioneering  
61 studies used chronic activity manipulations and did not define an end-point for homeostatic  
62 plasticity<sup>12-15</sup>. Here, we expressed the anion channelrhodopsin GtACR2<sup>16</sup> specifically in the  
63 aCC/RP2 MNs and delivered acute 1 hour (h) pulses of silencing terminating at progressively  
64 later times in larval development (Fig. 1b-g). We found that silencing MNs in late embryo  
65 (stage 17) produced a significant increase in aCC/RP2 dendritic volume at 0 h after larval  
66 hatching (ALH). Silencing at later stages showed progressively less of an effect, with no  
67 remodeling occurring at 8 h ALH or beyond (Fig. e-g; quantified in 1k). In contrast, acute  
68 pulses of activation using the channelrhodopsin Chrimson<sup>17</sup> resulted in significant loss of MN  
69 dendrites at 0 h ALH (Fig. 1h; quantified in Fig. 1k and Extended Data Fig. 1); activating at 8  
70 h ALH and beyond had little or no effect (Fig. 1i-j; quantified in Fig. 1k). Similar results were  
71 observed using TrpA1 to thermogenetically activate the MNs (Extended Data Fig. 1). Note  
72 that these experiments used far shorter periods of tonic activation than past studies<sup>13-16,18-21</sup>.  
73 Importantly, activity-induced dendrite loss in late embryo could be rescued by a 22 h period  
74 of dark-rearing lacking Chrimson-induced activity (Fig. 1l-p), indicating that activity induces  
75 dendrite plasticity, and not excitotoxicity. Together, these experiments define a critical period  
76 for activity-dependent motor dendrite plasticity in the early larva, and to our knowledge,  
77 represent the first analyses of motor circuit critical period closure within the CNS<sup>19,22-24</sup>.

## 79 MN activation during the critical period induces dendrite retraction within minutes

80  
81 In vertebrates, homeostatic plasticity functions on a slow timescale – hours to days<sup>25</sup>. To  
82 determine the timescale for MN dendrite expansion following GtACR2 silencing, we silenced  
83 aCC/RP2 MNs for three different lengths of time (15', 1 h, 4 h) in late embryo and  
84 visualized dendritic morphology in single, well-spaced RP2 neurons in newly hatched larvae  
85 (0 h ALH) using MCFO<sup>26</sup>. We observed increased dendritic arbor size and complexity  
86 following 1 and 4 h of silencing (Fig. 2a-f). We confirmed these results using a different  
87 method of neuronal silencing: the dominant negative, temperature sensitive isoform of  
88 *shibire*<sup>27</sup> (Extended Data Fig. 2). In contrast, Chrimson activation resulted in decreased  
89 dendrite length and complexity in as little as 15' activation (Fig. 2g-l). The fact that silencing  
90 required more time to show an effect is not altogether surprising, as activity-induced  
91 retraction could be achieved through rapid collapse of dynamic cytoskeletal elements,  
92 whereas extension requires generation of new membrane<sup>28-31</sup>.

93 To further characterize the rapid activation-induced changes in dendrite morphology,  
94 we performed live imaging. Both control (*myr::GFP*) and activated (*Chrimson::mVenus*)  
95 dendrites showed numerous filopodial protrusions over time (Extended Data Fig. 3,  
96 Supplementary Movies 1-2), consistent with *in vivo* dendrite dynamics in other systems<sup>32-35</sup>.  
97 We first observed significant distal dendrite retraction within 12' of Chrimson activation  
98 (Extended Data Fig. 3d). We conclude that activity-induced remodeling of *Drosophila* MNs  
99 occurs on the scale of whole dendritic branches and operates on a time course of minutes,  
100 much faster than previously documented for homeostatic plasticity in mammals<sup>25</sup>.

## 102 Activity level scales excitatory/inhibitory synaptic inputs during the critical period

103  
104 We have shown above that MN silencing increases dendritic arbor size, whereas MN  
105 activation decreases arbor size. An important question is whether these morphological  
106 changes are accompanied by changes in excitatory or inhibitory (E/I) synaptic inputs. To  
107 identify and quantitate E/I inputs, we used the excitatory cholinergic neuron A18b and the  
108 inhibitory GABAergic neuron A23a, which we show are each synaptically coupled to the  
109 aCC/RP2 dendrites in a TEM reconstruction of the larval CNS<sup>17,36</sup> (Extended Data Fig. 4). To  
110 quantitate E/I synapse number by light microscopy, we used the LexA/LexAop binary system  
111 to express a functionally-inactive pre-synaptic marker *Bruchpilot<sup>short</sup>::Cherry (Brp)*<sup>37</sup> in A18b  
112 or A23a. We quantified Brp puncta overlapping with aCC/RP2 dendritic membrane (putative  
113 synapses) using published methods<sup>37-39</sup> and observed Brp puncta numbers matching synapse  
114 numbers by TEM in stage-matched brains (4 h ALH; A18b: 19.5±4.9 Brp+ puncta vs. 20±2.5  
115 TEM synapses per hemisegment; A23a: 16.9±4.1 vs. 19.5±3.5). Thus, Brp+ puncta contacting  
116 MN dendritic membrane are a good proxy for excitatory (A18b) or inhibitory (A23a)  
117 premotor synapses.

118 We quantified A18b excitatory cholinergic synapse number onto aCC/RP2 dendrites  
119 before and after activation or silencing. We found that MN activation, but not silencing,  
120 significantly decreased A18b excitatory synapses onto aCC/RP2 dendrites (Fig. 2 m-n’;  
121 quantified in 2q). Thus, increasing MN activity leads to a compensatory reduction of  
122 excitatory pre-synaptic inputs. We next quantified A23a inhibitory GABAergic synapses onto  
123 aCC/RP2 dendrites. We found that MN silencing, but not activation, reduced the number of  
124 inhibitory synapses between A23a and aCC/RP2 dendrites (Figure 2o-p’; quantified in 2q).  
125 Thus, decreasing MN activity leads to a compensatory reduction of inhibitory pre-synaptic  
126 inputs. In sum, MNs scale E/I inputs relative to their level of activity during the critical  
127 period, presumably to maintain E/I homeostasis (Fig 2r).

128

### 129 **Astrocytes terminate the critical period**

130

131 Despite the prevalence of well-characterized critical period models in vertebrate systems, the  
132 molecular mechanisms that close critical periods are poorly defined. *Drosophila* astrocytes  
133 begin to infiltrate the neuropil in the late embryo<sup>40</sup>, prior to closure of the critical period. To  
134 test whether astrocytes promote critical period closure, we genetically ablated all astrocytes  
135 (see Methods) and used Chrimson to assay for extension of critical period plasticity at 8 h  
136 ALH (Fig. 3, Extended Data Fig. 5). Astrocyte elimination was confirmed by staining for the  
137 astrocyte marker Gat (Extended Data Fig. 6). As expected, controls closed the critical period  
138 by 8 h ALH (Fig. 3a,b; quantified in 3e). In contrast, astrocyte ablation extended the critical  
139 period through 8 h ALH (Fig. 3c,d; quantified in 3e). Similar results were observed following  
140 4 h, 1 h, or 15’ of activation (Extended Data Fig. 5). We conclude that astrocytes are required  
141 for proper critical period closure. Supporting this conclusion, we found that control motor  
142 dendrites were less dynamic after critical period closure, but that astrocyte ablation extends  
143 dendrite filopodial dynamicity (Fig. 3g-l, Supplementary Movies 3-6). We conclude that  
144 astrocytes are required for the transition from dynamic to stable filopodia, and the concurrent  
145 closure of the critical period.

146

### 147 **Identification of astrocyte signaling pathways that close the critical period**

148

149 How do astrocytes close the critical period? Astrocytes are known to communicate with  
150 neurons for proper synapse formation, elimination, and function via both cell surface  
151 molecules and secreted proteins<sup>41-43</sup>. We therefore used the astrocyte-specific *alrm-gal4* to  
152 perform an RNAi knock down (KD) screen using commercially available *UAS-RNAi* lines<sup>44</sup>.  
153 We tested 61 lines encompassing 49 genes curated for known functions in astrocytes and/or  
154 genes identified in a parallel screen for astrocyte-derived genes that regulate motor function  
155 (see Methods). Animals were reared at 30°C to obtain maximum RNAi expression and  
156 assayed at 8 h ALH for extension of the critical period. We assayed Chrimson-induced  
157 plasticity, as dendrite retraction is more rapidly screenable by eye. Knockdown of most genes

158 had no effect on critical period closure. However, four genes were required in astrocytes for  
159 timely critical period closure: *gat* (regulates E/I balance), *CG43313* (synthesizes inhibitory  
160 extracellular matrix CSPGs), and the Neuroligins (Nlg) 4 and 2 (Fig. 4a-g). Importantly, KD  
161 of each gene had little or no effect on astrocyte survival or morphology (Extended Data Fig.  
162 6), suggesting a more specific defect in astrocyte-motor neuron signaling.

163 Here, we focus on Neuroligins, which bind cell adhesion proteins called Neurexins  
164 (Nrx). We used RNAi against *nrx-1*, known to bind both *nlg2/4*<sup>45,46</sup>, specifically in aCC/RP2  
165 MNs, and observed extension of the critical period (Fig. 4h-k); this is consistent with  
166 astrocyte Nlg2/4 and MN Nrx-1 acting in a common pathway to close the critical period.  
167 Notably, while Nrx-1 is generally considered pre-synaptic, there is ample evidence in both  
168 invertebrate and vertebrate systems for dendritic localization of these receptors<sup>47-50</sup>. We next  
169 used previously published Crispr-induced overexpression lines<sup>51</sup> for Nrx-1 and Nlg2 to  
170 determine if they could induce precocious critical period closure. As expected, controls with  
171 Chrimson activation in aCC/RP2 from 3-4 h ALH showed strong dendritic reduction (Fig.  
172 1k); in contrast, forced expression of Nrx-1 in aCC/RP2 MNs prematurely closed the critical  
173 period, as seen by absence of Chrimson-induced dendritic loss at 3-4 h ALH (Fig. 4l-m,  
174 quantified in 4o). Similarly, overexpression of Nlg2 alone in astrocytes was sufficient to  
175 prematurely close the critical period (Fig. 4n-o). We conclude that the Nlg2/Nrx-1  
176 ligand/receptor pair are required in astrocytes and MNs (respectively) for timely closure of the  
177 critical period.

178

### 179 **Nrx-1 signaling stabilizes dendritic microtubules at critical period closure**

180

181 How does Nlg2/Nrx-1 signaling close the critical period? Nrx-1 promotes motor axon  
182 microtubule stability<sup>52,53</sup>, suggesting a microtubule-stabilization mechanism for critical period  
183 closure. To test this hypothesis, we used Chrimson::mVenus to activate and visualize  
184 aCC/RP2 dendrite membranes at 0 h ALH (peak critical period), and Cherry::Zeus to  
185 visualize stable microtubules during and after dendritic retraction. In live preparations,  
186 Cherry::Zeus was most robust in proximal dendritic arbors, though stable microtubules were  
187 also observed in extending distal processes (Fig. 4p). Interestingly, processes that undergo  
188 remodeling showed a reduction in Cherry::Zeus intensity immediately preceding dendrite  
189 retraction (Fig. 4q, Supplementary Movie 7), suggesting that microtubule collapse within  
190 distal branches can induce dendrite retraction. In fixed preparations, we found that proximal  
191 dendrites with the highest levels of stable microtubules were protected from activity-  
192 dependent retraction (Extended Data Fig. 7). Interestingly, overexpression of Nrx-1 was  
193 sufficient to increase both stable microtubules and dendrite stability (Fig. 4r-x, Supplementary  
194 Movies 8-9). We propose that Nlg2 in astrocytes binds Nrx-1 in MNs to stabilize dendritic  
195 microtubules and close the critical period (Fig. 4y; see Discussion).

196

197

## 198 **Timely closure of the critical period is required for normal locomotor behavior**

199  
200 In mammals, inappropriate extension of critical periods compromises nervous system  
201 function<sup>2</sup>. We extended the critical period by temperature controlled RNAi of critical period  
202 regulators until 12 h ALH, and then restored gene expression until 44 h ALH, when they were  
203 assayed for locomotor behavior (protocol established in [Extended Data Fig. 8](#) and illustrated  
204 in [Extended Data Fig. 9a-b](#)). Control larvae showed strong linear persistence; in contrast,  
205 most larvae with extended critical periods showed excessive turning resulting in spiraled  
206 trajectories. We also observed deviations in speed, distance from origin, accumulated  
207 distance, cumulative bending angle, or pausing in larvae with extended critical periods  
208 ([Extended Data Fig. 9c-t](#)). We propose that timely closure of the MN critical period is  
209 essential for normal larval locomotor behavior.

## 210 211 **Discussion**

212  
213 Astrocytes have a well-characterized role in synaptogenesis, synaptic pruning and synaptic  
214 efficacy<sup>51</sup>, but little is known about their role in critical period closure. In this study, we  
215 identified astrocytes as promoting closure of a motor critical period required for locomotor  
216 function, and define a series of astrocyte-MN signaling pathways, both known and novel,  
217 required to close the critical period. Based on previous literature, we hypothesized that  
218 astrocytes could modify critical period closure through regulation of E/I balance<sup>2,52</sup> or  
219 extracellular matrix composition<sup>42</sup>. Consistent with mammalian studies, we found that  
220 perturbing E/I balance through astrocyte-specific RNAi of the sole GABA transporter, *Gat*,  
221 was sufficient to extend critical period plasticity. Further, we found that increasing levels of  
222 extracellular matrix chondroitin sulfate proteoglycans (CSPGs) through RNAi KD *CG43313*,  
223 homologous to mammalian Chondroitin sulfate synthase 2 enzyme<sup>53</sup>, extended critical period  
224 plasticity. Similarly, MN-specific RNAi KD of the CSPG receptor *lar*<sup>54</sup> also extended critical  
225 period plasticity ([Fig. 4h-k](#)). Thus, our data suggest that astrocytes employ similar strategies  
226 in both *Drosophila* and mammals to regulate critical periods. Unexpectedly, we also  
227 identified astrocyte-derived Neuroligins, and their neuronal partner *Nrx-1*, as instrumental for  
228 critical period closure. In mammals, Neuroligins are known to regulate synapse formation and  
229 astrocyte morphology<sup>43</sup>, but their role in regulating critical period closure is novel.

230 Our data support the hypothesis that *Nrx-1* signaling in motor dendrites increases local  
231 microtubule stability to close the critical period, but how *Nrx-1* alters microtubule stability  
232 remains to be tested. Recent reports indicate that local reactive oxygen species (ROS)  
233 signaling can trigger homeostatic dendritic retraction<sup>21,55</sup>. Mutations in Neuroligins are  
234 associated with increased ROS sensitivity<sup>56</sup>. Further, microtubule-binding proteins are known  
235 targets of ROS and increased ROS levels can destabilize microtubules<sup>57</sup>. It is interesting to  
236 speculate that during the critical period, rapid dendritic retraction is achieved through local  
237 accumulation of ROS, which is suppressed upon Neuroligin-Neurexin signaling from



238 astrocytes to MNs. In sum, closure of the motor circuit critical period is induced by astrocyte  
239 Neuroligin to MN Neurexin signaling to stabilize dendritic microtubules.

240

241

242

243

244 **DATA AND CODE AVAILABILITY**

245 This study did not generate/analyze datasets/code.

246

247 **Acknowledgements**

248 We thank Takashi Suzuki, Stephen Cohen, Ellie Heckscher, and Vivek Jayaraman for  
249 providing fly stocks. We thank Kelly Monk, Jim Skeath, Dave Lyons, and members of the  
250 Doe lab for comments on the manuscript. Stocks obtained from the Bloomington Drosophila  
251 Stock Center and Shigen National Institute of Genetics (NIH P40OD018537) were used in  
252 this study. Funding was provided by HHMI (CQD), R01 HD27056 (CQD), R01 NS059991  
253 (MRF) and NIH F32NS098690 (SDA). SDA is a Milton Safenowitz Post-doctoral fellow of  
254 the ALSA.

255

256 **Author Contributions**

257 SDA conceived of the project; SDA and NPC performed experiments; MRF and CQD  
258 provided feedback during the project; SDA, NPC, and CQD wrote the paper and prepared the  
259 Figures. All authors commented and approved of the manuscript.

260

261 **Competing Interest Statement**

262 The authors declare no competing financial interests.

263



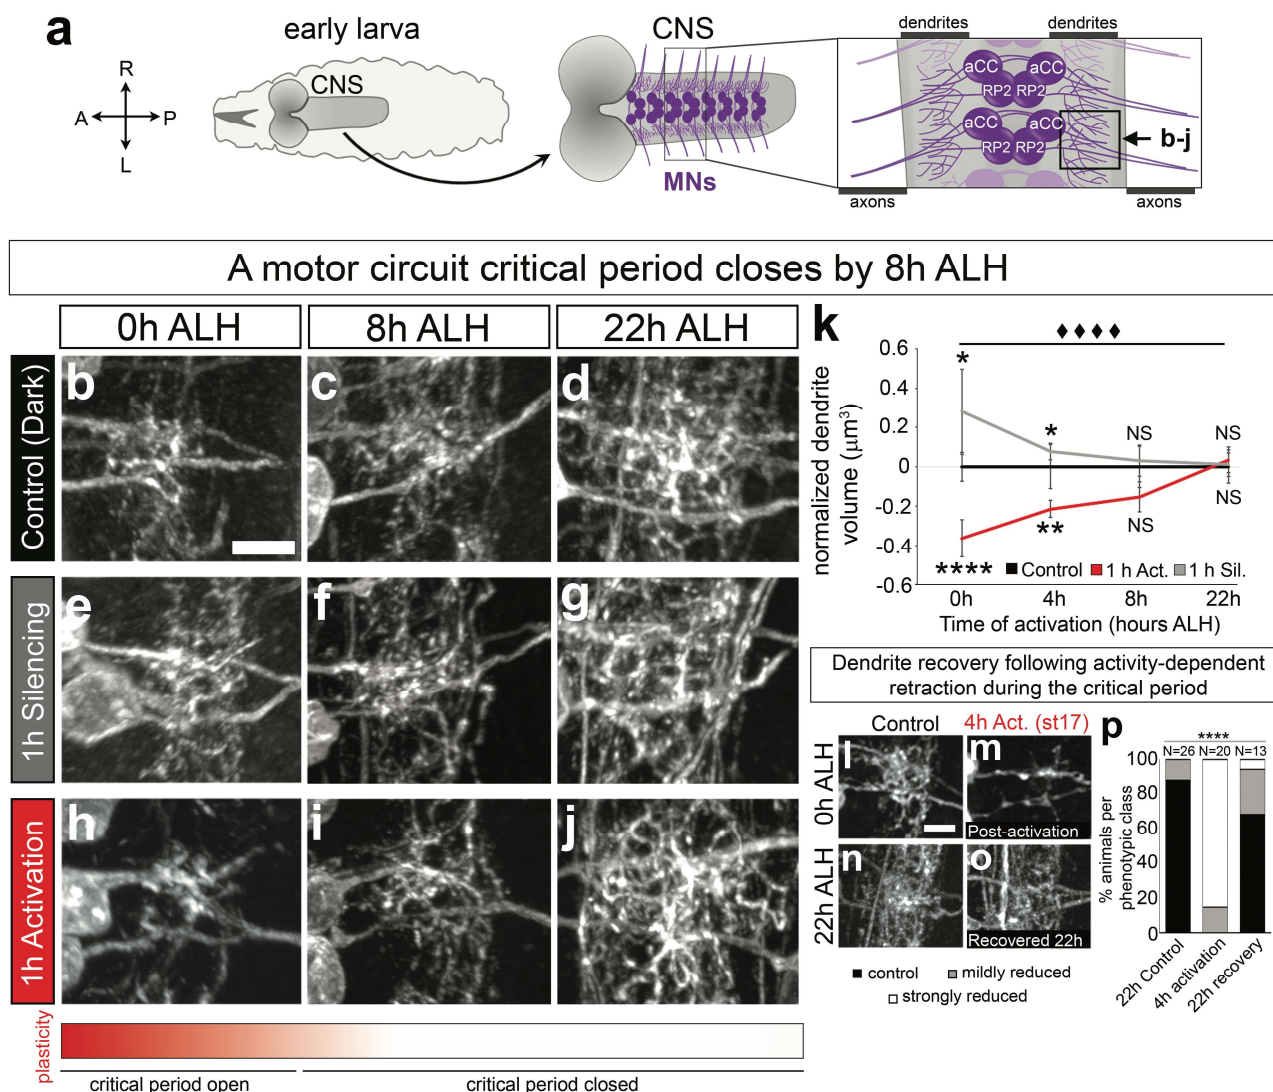

264  
 265 **Figure 1. A critical period for motor circuit plasticity at the embryo/larval transition.**  
 266 (a) Schematic for reader orientation. A, anterior. P, posterior. L, left. R, right. CNS, central nervous system.  
 267 MNs, motor neurons. (b-j) aCC/RP2 dendritic arbor (single hemisegment) from (b-d) dark-reared control,  
 268 and following (e-g) 1 h of light silencing or (h-j) 1 h of light activation ending at the indicated stage.  
 269 Genotypes: Control and silencing: *RN2-gal4,UAS-GtACR2::EYFP*; activation: *RN2-gal4,UAS-*  
 270 *CsChrimson::mCherry*.  $N \geq 6$  brains each, volume averaged across 4 hemisegments (A1-A2). Scale bar, 5  
 271  $\mu\text{m}$ . (k) Quantification of critical period plasticity. (l-o) aCC/RP2 dendritic arbor (single hemisegment)  
 272 following embryonic activation (st17) and subsequent dark-rearing to allow recovery (0 h vs. 22 h ALH).  
 273 Genotype: *RN2-gal4,UAS-CsChrimson::mCherry*. Brains were categorized qualitatively as in [Extended](#)  
 274 [Data Fig. 1b-d](#). (p) Quantification. Scale bars, 5  $\mu\text{m}$ . Labels used here and below: \*,  $p < .05$ ; \*\*,  $p < .01$ ; \*\*\*,  
 275  $p < .001$ ; \*\*\*\*,  $p < .0001$ , NS= not significant. Error bars: standard deviation and one-way ANOVA used  
 276 unless otherwise noted. ◆ used in place of \* to denote significance following two-way ANOVA when both  
 277 one-way and two-way are displayed together.

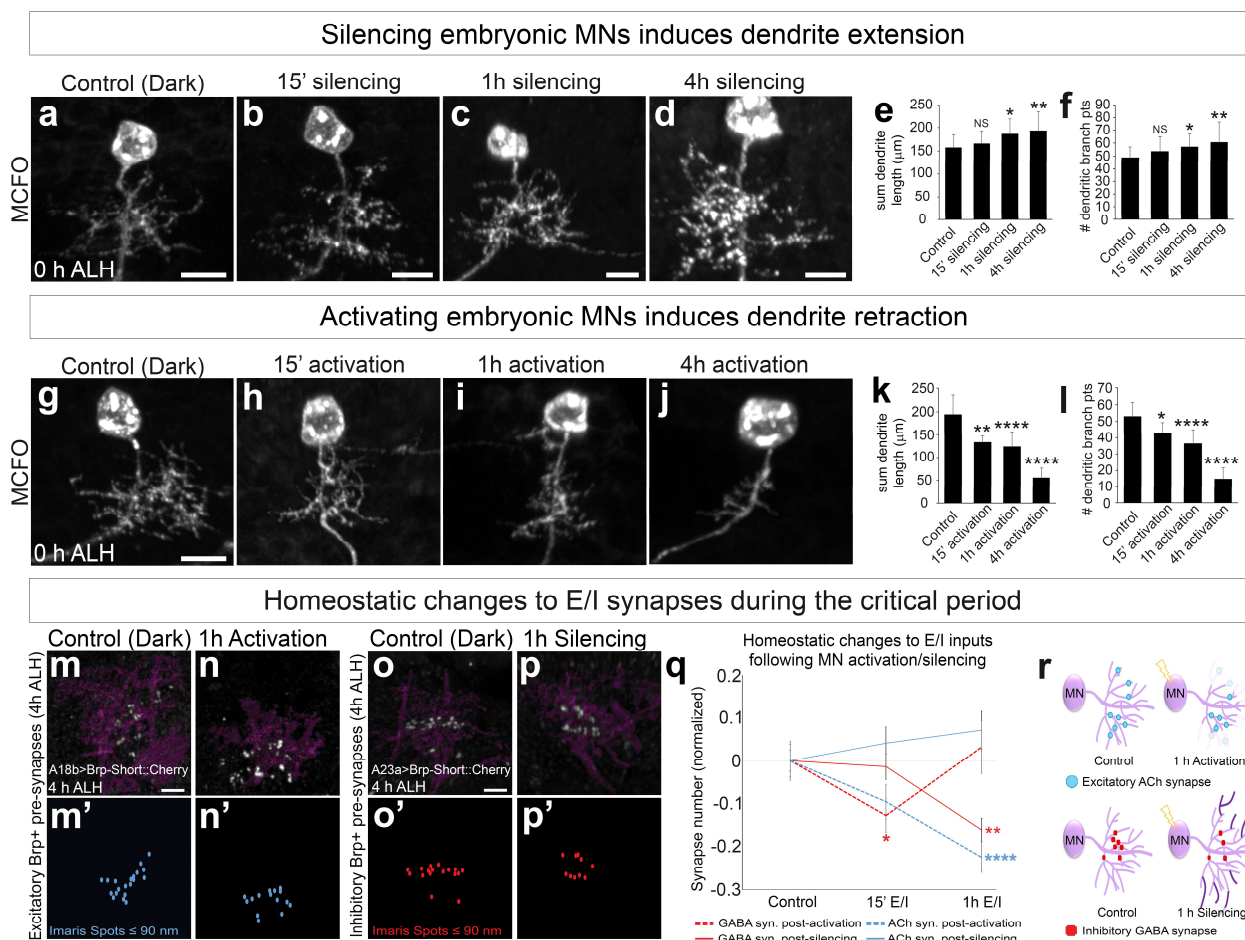

278  
 279 **Figure 2. Embryonic MNs scale dendrite length and synaptic inputs to their level of activity.**  
 280 (a-d) GtACR2 silencing (or control) for the indicated times prior to 0 h ALH combined with MCFO to  
 281 visualize single RP2 dendrites; N = #neurons/#animals: N=21/15, 12/9, 13/9, 15/9, respectively. Genotype:  
 282 *RN2-gal4,UAS-GtACR2::EYFP,UAS-hsMCFO*. Scale bar, 5 µm. (e-f) Quantification of dendritic length or  
 283 branching. (g-j) Chrimson activation (or control) for the indicated times prior to 0 h ALH combined with  
 284 MCFO to visualize single RP2 dendrites; N = #neurons/#animals: 18/15, 7/6, 16/11, 29/19, respectively.  
 285 Genotype: *RN2-gal4,UAS-CsChrimson::mCherry,UAS-hsMCFO*. Scale bar, 5 µm. (k-l) Quantification of  
 286 dendritic length or branching. (m-n) Imaris “Surface” from (m) control or (n) post-Chrimson activation  
 287 from 3–4 h ALH (critical period open; magenta, dendrite marker) with presynaptic Brp-short::Cherry puncta  
 288 (white) from the excitatory A18b neuron; (m’-n’) Imaris “Spots”, presynaptic Brp puncta within 90 nm of  
 289 dendritic surface. Scale bar, 2 µm. Genotype: *RN2-gal4,UAS-Chrimson::mVenus; 94E10-lexA,lexAop-brp-*  
 290 *short::cherry*. (o-p) Imaris “Surface” from (o) control or (p) post-GtACR2 silencing from 3–4 h ALH  
 291 (critical period open; magenta, dendrite marker) with presynaptic Brp-short::Cherry puncta (white) from the  
 292 inhibitory A23a neuron; (o’-p’) Imaris “Spots”, presynaptic Brp puncta within 90 nm of dendritic surface.  
 293 Scale bar, 2 µm. Genotype: *RN2-gal4,UAS-GtACR2::eYFP; 78F07-lexA,lexAop-brp-short::cherry*. (q)  
 294 Quantification of synapse number following MN excitation or inhibition. N = #hemisegments/#animals:  
 295 A18b Chrimson N= 18/6 (control); 19/8 (15’ activation); 21/6 (1 h activation). A18b GtACR2 N= 12/9  
 296 (control); 17/9 (15’ silencing); 17/8 (1 h silencing). A23a Chrimson N= 33/11 (control); 30/9 (15’  
 297 activation); 22/5 (1 h activation). A23a GtACR2 N= 52/13 (control); 36/10 (15’ silencing); 47/17 (1 h  
 298 silencing). Error bars, SEM. (r) Summary.

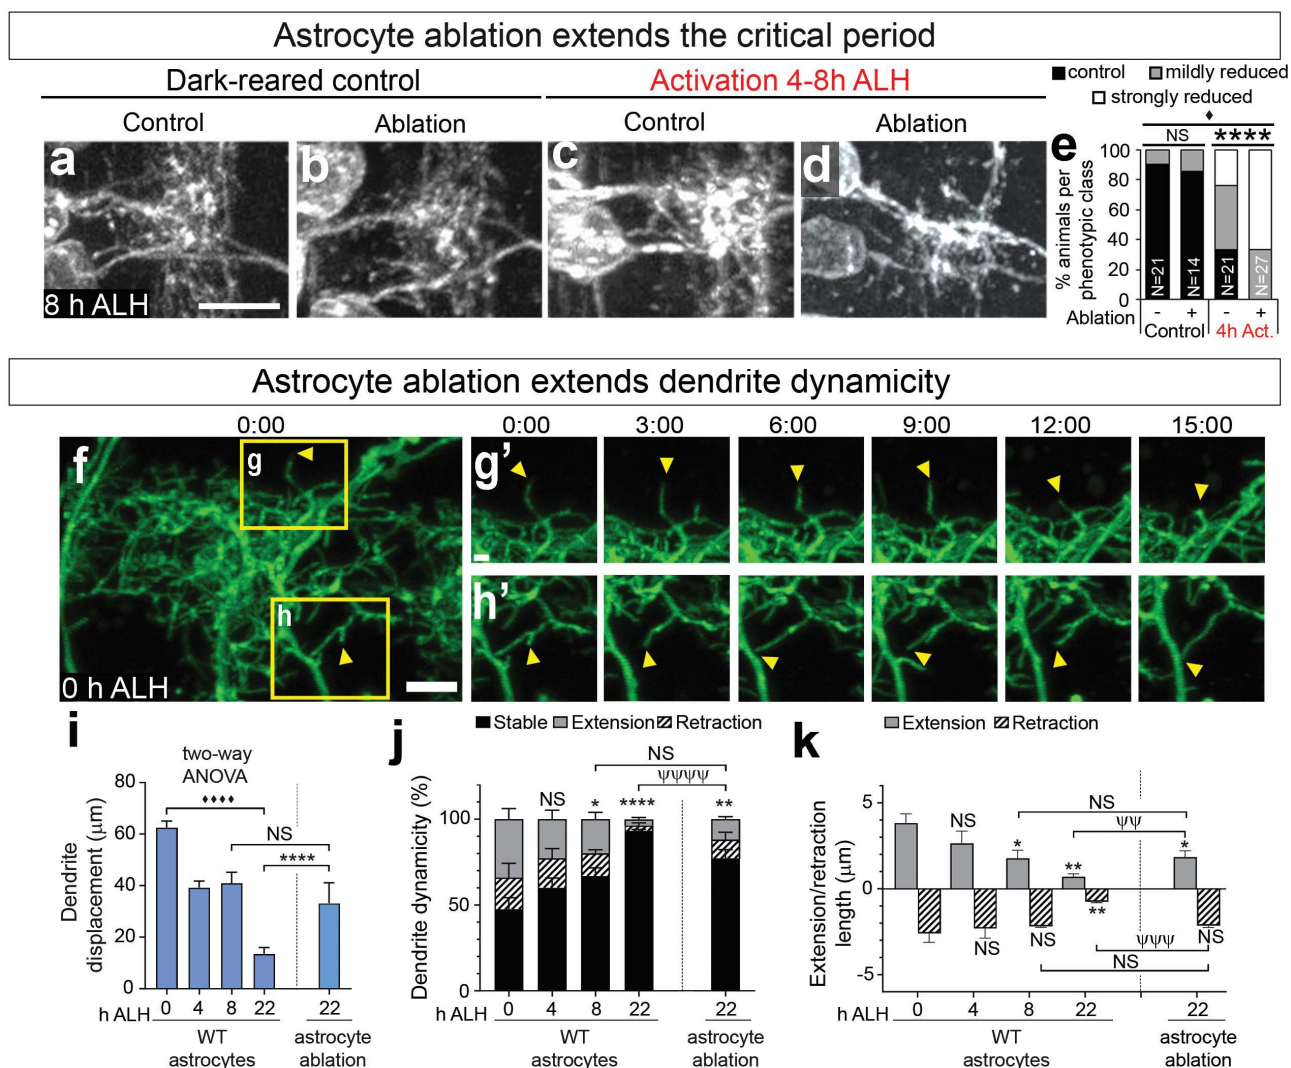

299

300

**Figure 3. Astrocytes terminate the critical period.**

301

(a-e) Astrocyte ablation prolongs the critical period. (a-d) aCC/RP2 dendrites in two hemisegments at a 8 h

302

ALH. (a-b) Dark-reared controls with or without astrocyte ablation. (c-d) Chromson activation in aCC/RP2

303

from 4-8 h ALH; note that astrocyte ablation prolongs the critical period to allow activity-dependent

304

dendrite reduction. Genotypes: *RN2-gal4,UAS-CsChrimson::mCherry*; *alm-lexA,lexAop-myr::GFP*

305

(control), *RN2-gal4,UAS-CsChrimson::mCherry*; *alm-lexA,lexAop-rpr* (ablation). Scale bar, 5 μm. (e)

306

Quantification.

307

(f-k) Astrocyte ablation prolongs dendrite dynamicity. (f) Live imaging of dendrite dynamics. 3D

308

projection, one hemisegment of aCC/RP2 dendrites at 0 h ALH. Yellow boxes (g-h), regions followed over

309

time. Scale bar: 5 μm. (g'-h') Dynamic dendrite filopodia (arrowheads) imaged for 15'. Scale bar, 1 μm.

310

Genotypes: *RN2-gal4,UAS-myr::GFP*; *alm-lexA* (control), *RN2-gal4,UAS-myr::GFP*; *alm-lexA,lexAop-*

311

*rpr* (ablation). (i-k) Quantification. N=50 dendrites from 5 brains per timepoint. ψ: comparisons between

312

ablation and controls (Fisher's exact tests).

313



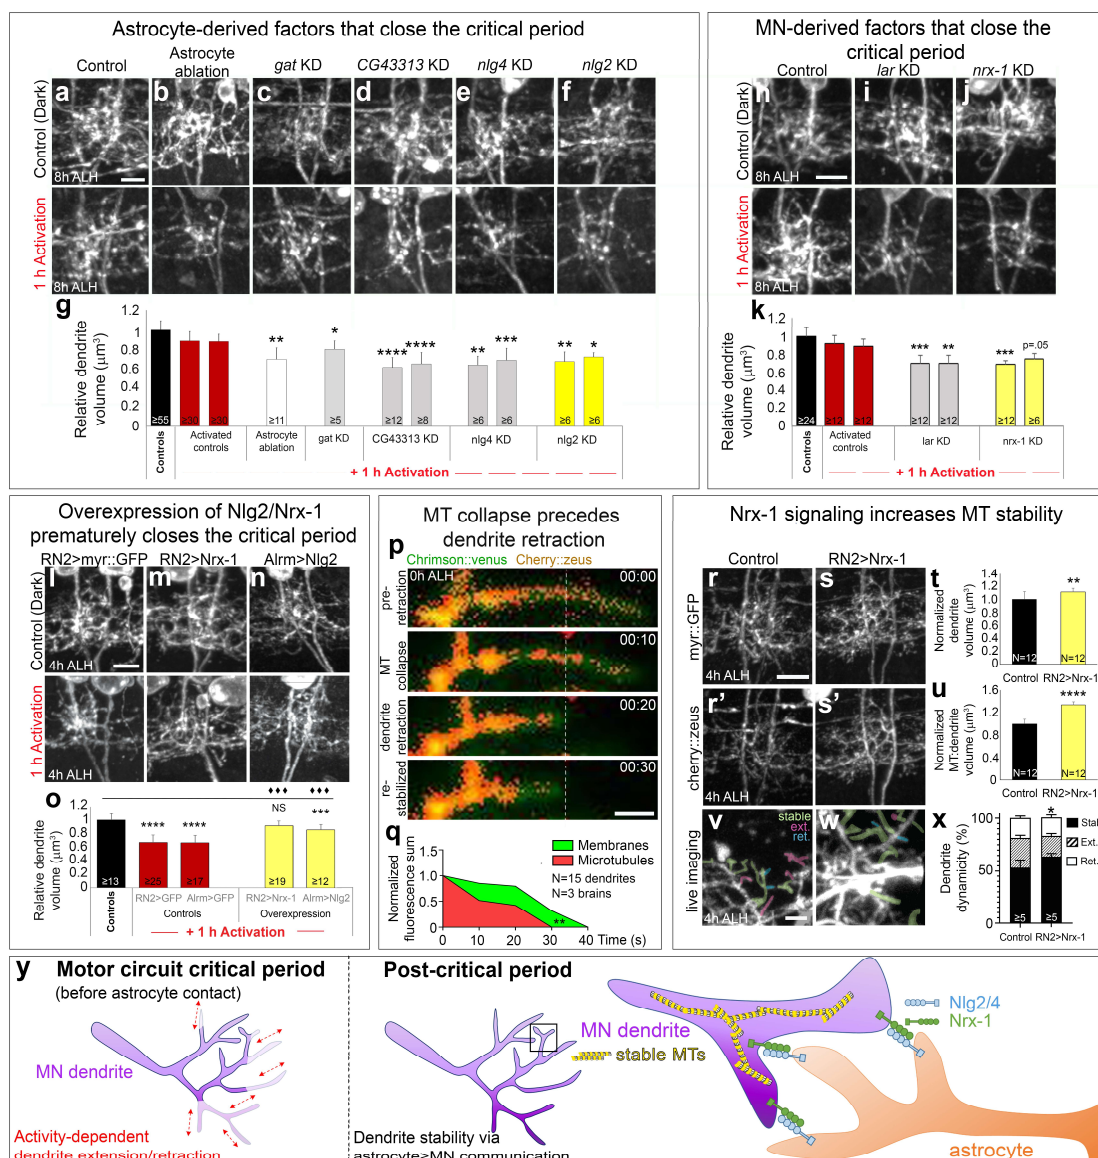

314  
 315 **Figure 4. Astrocyte Neuroigin signals to MN Neurexin to stabilize microtubules and close the critical period.**  
 316 **(a-k)** Factors in astrocytes **(a-f)** or MNs **(h-j)** required to close the critical period. aCC/RP2 dendrites in one hemisphere  
 317 at 8 h ALH. Top row, dark reared controls; bottom row, experimentals. Genotypes: **(a,c,e-f)** *lexAop-*  
 318 *CsChrimson::mVenus,RN2-lexA,alrm-gal4 UAS-RNAi*, **(b)** *RN2-gal4,UAS-Chrimson::mCherry,lexAop-rpr, alrm-lexA* **(h-**  
 319 **j)**, *RN2-gal4,UAS-CsChrimson::mCherry UAS-RNAi*. Scale bar, 5  $\mu$ m. **(g,k)** Quantification, two-way ANOVA. **(l-n)**  
 320 Precocious critical period closure at 4 h ALH by overexpression of **(m)** Nrx-1 or **(n)** Nlg2 in MNs or astrocytes,  
 321 respectively. Genotypes: **(l-m)** *RN2-gal4,UAS-CsChrimson::mCherry x UAS-myr::GFP* or *UAS-Nrx-1*, **(n)** *RN2-*  
 322 *lexA,lexAop-Chrimson::tdTomato,alrm-gal4 x UAS-Nlg2*. Scale bar, 5  $\mu$ m. **(o)** Quantification. **(p)** Live imaging of  
 323 aCC/RP2 dendrites expressing Chrimson::mVenus (green) and Cherry::zeus (stable microtubules, heatmap) at 0 h ALH.  
 324 Dashed line, retraction landmark. **(q)** Quantification, Two-way ANOVA. **(r-s)** Dendritic (myr::GFP) distribution of **(r'-**  
 325 **s')** microtubules (Cherry::Zeus) in **(r-r')** controls and **(s-s')** post-overexpression of Nrx-1 in MNs at 4 h ALH. Genotypes:  
 326 **(r-r')** *RN2-gal4,UAS-myr::GFP,UAS-Cherry::Zeus,UAS-redstingerNLS* **(s-s')** *RN2-gal4,UAS-myr::GFP, UAS-*  
 327 *Cherry::Zeus,UAS-Nrx-1*. **(t-u)** Quantification of dendrite volume or microtubule:dendrite volume. **(v-w)** Live imaging of  
 328 stable microtubules (Cherry::Zeus+) in aCC/RP2 **(v)** control or **(w)** Nrx-1 overexpression dendrites. Genotypes: **(v)** *RN2-*  
 329 *gal4,UAS-myr::GFP,UAS-Cherry::Zeus*, **(w)** *RN2-gal4, UAS-Cherry::Zeus,UAS-Nrx-1*. Pseudocoloring: stable (green),  
 330 extending (pink), or retracting (blue) dendrites. **(x)** Quantification, Fisher's Exact Test. **(y)** Summary.

331 **References**

332

- 333 1 Keck, T. et al. Integrating Hebbian and homeostatic plasticity: the current state of the field  
334 and future research directions. *Philos Trans R Soc Lond B Biol Sci* **372** (2017).
- 335 2 Takesian, A. E. & Hensch, T. K. Balancing plasticity/stability across brain development.  
336 *Prog Brain Res* **207**, 3-34 (2013).
- 337 3 Hubener, M. & Bonhoeffer, T. Neuronal plasticity: beyond the critical period. *Cell* **159**,  
338 727-737 (2014).
- 339 4 Knott, G. W., Quairiaux, C., Genoud, C. & Welker, E. Formation of dendritic spines with  
340 GABAergic synapses induced by whisker stimulation in adult mice. *Neuron* **34**, 265-273  
341 (2002).
- 342 5 Liu, Q. et al. Branch-specific plasticity of a bifunctional dopamine circuit encodes protein  
343 hunger. *Science* **356**, 534-539 (2017).
- 344 6 Tagawa, Y., Kanold, P. O., Majdan, M. & Shatz, C. J. Multiple periods of functional  
345 ocular dominance plasticity in mouse visual cortex. *Nat Neurosci* **8**, 380-388 (2005).
- 346 7 Insel, T. R. Rethinking schizophrenia. *Nature* **468**, 187-193 (2010).
- 347 8 LeBlanc, J. J. & Fagiolini, M. Autism: a "critical period" disorder? *Neural Plast* **2011**,  
348 921680 (2011).
- 349 9 Tien, N. W. & Kerschensteiner, D. Homeostatic plasticity in neural development. *Neural*  
350 *Dev* **13**, 9 (2018).
- 351 10 Mesulam, M. M. Neuroplasticity failure in Alzheimer's disease: bridging the gap between  
352 plaques and tangles. *Neuron* **24**, 521-529 (1999).
- 353 11 Landgraf, M., Jeffrey, V., Fujioka, M., Jaynes, J. B. & Bate, M. Embryonic origins of a  
354 motor system: motor dendrites form a myotopic map in *Drosophila*. *PLoS Biol* **1**, E41  
355 (2003).
- 356 12 Tripodi, M., Evers, J. F., Mauss, A., Bate, M. & Landgraf, M. Structural homeostasis:  
357 compensatory adjustments of dendritic arbor geometry in response to variations of  
358 synaptic input. *PLoS Biol* **6**, e260 (2008).
- 359 13 Timmerman, C. et al. The *Drosophila* transcription factor Adf-1 (nalyot) regulates  
360 dendrite growth by controlling FasII and Stauf expression downstream of CaMKII and  
361 neural activity. *J Neurosci* **33**, 11916-11931 (2013).
- 362 14 Vonhoff, F., Kuehn, C., Blumenstock, S., Sanyal, S. & Duch, C. Temporal coherency  
363 between receptor expression, neural activity and AP-1-dependent transcription regulates  
364 *Drosophila* motoneuron dendrite development. *Development* **140**, 606-616 (2013).
- 365 15 Vonhoff, F. & Duch, C. Tiling among stereotyped dendritic branches in an identified  
366 *Drosophila* motoneuron. *J Comp Neurol* **518**, 2169-2185 (2010).
- 367 16 Mauss, A. S., Busch, C. & Borst, A. Optogenetic Neuronal Silencing in *Drosophila* during  
368 Visual Processing. *Sci Rep* **7**, 13823 (2017).
- 369 17 Carreira-Rosario, A. et al. MDN brain descending neurons coordinately activate backward  
370 and inhibit forward locomotion. *Elife* **7** (2018).
- 371 18 Crisp, S., Evers, J. F., Fiala, A. & Bate, M. The development of motor coordination in  
372 *Drosophila* embryos. *Development* **135**, 3707-3717 (2008).
- 373 19 Peng, J. J. et al. A circuit-dependent ROS feedback loop mediates glutamate excitotoxicity  
374 to sculpt the *Drosophila* motor system. *Elife* **8** (2019).

- 375 20 Stacey, S. M. et al. Drosophila glial glutamate transporter Eaat1 is regulated by fringe-  
376 mediated notch signaling and is essential for larval locomotion. *J Neurosci* **30**, 14446-  
377 14457 (2010).
- 378 21 Oswald, M. C. et al. Reactive oxygen species regulate activity-dependent neuronal  
379 plasticity in Drosophila. *Elife* **7** (2018).
- 380 22 Jarecki, J. & Keshishian, H. Role of neural activity during synaptogenesis in Drosophila. *J*  
381 *Neurosci* **15**, 8177-8190 (1995).
- 382 23 Hensch, T. K. Critical period regulation. *Annu Rev Neurosci* **27**, 549-579 (2004).
- 383 24 Crisp, S. J., Evers, J. F. & Bate, M. Endogenous patterns of activity are required for the  
384 maturation of a motor network. *J Neurosci* **31**, 10445-10450 (2011).
- 385 25 Turrigiano, G. Homeostatic synaptic plasticity: local and global mechanisms for  
386 stabilizing neuronal function. *Cold Spring Harb Perspect Biol* **4**, a005736 (2012).
- 387 26 Nern, A., Pfeiffer, B. D. & Rubin, G. M. Optimized tools for multicolor stochastic  
388 labeling reveal diverse stereotyped cell arrangements in the fly visual system. *Proc Natl*  
389 *Acad Sci U S A* **112**, E2967-2976 (2015).
- 390 27 Kitamoto, T. Conditional modification of behavior in Drosophila by targeted expression  
391 of a temperature-sensitive shibire allele in defined neurons. *J Neurobiol* **47**, 81-92 (2001).
- 392 28 Horton, A. C. et al. Polarized secretory trafficking directs cargo for asymmetric dendrite  
393 growth and morphogenesis. *Neuron* **48**, 757-771 (2005).
- 394 29 Taylor, C. A., Yan, J., Howell, A. S., Dong, X. & Shen, K. RAB-10 Regulates Dendritic  
395 Branching by Balancing Dendritic Transport. *PLoS Genet* **11**, e1005695 (2015).
- 396 30 Ye, B. et al. Growing dendrites and axons differ in their reliance on the secretory pathway.  
397 *Cell* **130**, 717-729 (2007).
- 398 31 Zou, W., Yadav, S., DeVault, L., Nung Jan, Y. & Sherwood, D. R. RAB-10-Dependent  
399 Membrane Transport Is Required for Dendrite Arborization. *PLoS Genet* **11**, e1005484  
400 (2015).
- 401 32 Arstikaitis, P., Gauthier-Campbell, C., Huang, K., El-Husseini, A. & Murphy, T. H.  
402 Proteins that promote filopodia stability, but not number, lead to more axonal-dendritic  
403 contacts. *PLoS One* **6**, e16998 (2011).
- 404 33 Dailey, M. E. & Smith, S. J. The dynamics of dendritic structure in developing  
405 hippocampal slices. *J Neurosci* **16**, 2983-2994 (1996).
- 406 34 Evers, J. F., Muench, D. & Duch, C. Developmental relocation of presynaptic terminals  
407 along distinct types of dendritic filopodia. *Dev Biol* **297**, 214-227 (2006).
- 408 35 Fiala, J. C., Feinberg, M., Popov, V. & Harris, K. M. Synaptogenesis via dendritic  
409 filopodia in developing hippocampal area CA1. *J Neurosci* **18**, 8900-8911 (1998).
- 410 36 Zarin, A. A., Mark, B., Cardona, A., Litwin-Kumar, A. & Doe, C. Q. A multilayer circuit  
411 architecture for the generation of distinct locomotor behaviors in Drosophila. *Elife* **8**  
412 (2019).
- 413 37 Berger-Muller, S. et al. Assessing the role of cell-surface molecules in central  
414 synaptogenesis in the Drosophila visual system. *PLoS One* **8**, e83732 (2013).
- 415 38 Chen, Y. et al. Cell-type-specific labeling of synapses in vivo through synaptic tagging  
416 with recombination. *Neuron* **81**, 280-293 (2014).
- 417 39 Sales, E. C., Heckman, E. L., Warren, T. L. & Doe, C. Q. Regulation of subcellular  
418 dendritic synapse specificity by axon guidance cues. *Elife* **8** (2019).

- 419 40 Stork, T., Sheehan, A., Tasdemir-Yilmaz, O. E. & Freeman, M. R. Neuron-glia  
420 interactions through the Heartless FGF receptor signaling pathway mediate  
421 morphogenesis of Drosophila astrocytes. *Neuron* **83**, 388-403 (2014).
- 422 41 Allen, N. J. & Eroglu, C. Cell Biology of Astrocyte-Synapse Interactions. *Neuron* **96**,  
423 697-708 (2017).
- 424 42 Dzyubenko, E., Gottschling, C. & Faissner, A. Neuron-Glia Interactions in Neural  
425 Plasticity: Contributions of Neural Extracellular Matrix and Perineuronal Nets. *Neural*  
426 *Plast* **2016**, 5214961 (2016).
- 427 43 Stogsdill, J. A. et al. Astrocytic neuroligins control astrocyte morphogenesis and  
428 synaptogenesis. *Nature* **551**, 192-197 (2017).
- 429 44 Perkins, L. A. et al. The Transgenic RNAi Project at Harvard Medical School: Resources  
430 and Validation. *Genetics* **201**, 843-852 (2015).
- 431 45 Liu, L. et al. Neurexin Restricts Axonal Branching in Columns by Promoting Ephrin  
432 Clustering. *Dev Cell* **41**, 94-106.e104 (2017).
- 433 46 Xing, G. et al. Neurexin-Neuroligin 1 regulates synaptic morphology and functions via the  
434 WAVE regulatory complex in Drosophila neuromuscular junction. *Elife* **7** (2018).
- 435 47 Savas, J. N. et al. The Sorting Receptor SorCS1 Regulates Trafficking of Neurexin and  
436 AMPA Receptors. *Neuron* **87**, 764-780 (2015).
- 437 48 Berninghausen, O. et al. Neurexin Ibeta and neuroligin are localized on opposite  
438 membranes in mature central synapses. *J Neurochem* **103**, 1855-1863 (2007).
- 439 49 Fairless, R. et al. Polarized targeting of neurexins to synapses is regulated by their C-  
440 terminal sequences. *J Neurosci* **28**, 12969-12981 (2008).
- 441 50 Taniguchi, H. et al. Silencing of neuroligin function by postsynaptic neurexins. *J Neurosci*  
442 **27**, 2815-2824 (2007).
- 443 51 Dallerac, G., Zapata, J. & Rouach, N. Versatile control of synaptic circuits by astrocytes:  
444 where, when and how? *Nat Rev Neurosci* **19**, 729-743 (2018).
- 445 52 Harauzov, A. et al. Reducing intracortical inhibition in the adult visual cortex promotes  
446 ocular dominance plasticity. *J Neurosci* **30**, 361-371 (2010).
- 447 53 Yamamoto-Hino, M. et al. Phenotype-based clustering of glycosylation-related genes by  
448 RNAi-mediated gene silencing. *Genes Cells* **20**, 521-542 (2015).
- 449 54 Duan, Y. & Giger, R. J. A new role for RPTPsigma in spinal cord injury: signaling  
450 chondroitin sulfate proteoglycan inhibition. *Sci Signal* **3**, pe6 (2010).
- 451 55 Baranov, S. V. et al. Mitochondria modulate programmed neuritic retraction. *Proc Natl*  
452 *Acad Sci U S A* **116**, 650-659 (2019).
- 453 56 Hunter, J. W. et al. Neuroligin-deficient mutants of *C. elegans* have sensory processing  
454 deficits and are hypersensitive to oxidative stress and mercury toxicity. *Dis Model Mech*  
455 **3**, 366-376 (2010).
- 456 57 Wilson, C. & Gonzalez-Billault, C. Regulation of cytoskeletal dynamics by redox  
457 signaling and oxidative stress: implications for neuronal development and trafficking.  
458 *Front Cell Neurosci* **9**, 381 (2015).
- 459
